# Supplementary material for: An Original HPLC Method with Coulometric Detection to Monitor Hydroxyl Radical Generation via Fenton Chemistry
Source: PubMed Central journal article supplement (PMC6749383; doi:10.3390/molecules24173066), 2019-08-23
Supplement: molecules-24-03066-s001.pdf [file molecules-24-03066-s001.pdf]

## *Supplementary Materials*

### **An original HPLC method with coulometric detection to monitor hydroxyl radical generation via Fenton chemistry**

Maria Carmen Catapano<sup>1,2</sup>, Michele Protti<sup>1\*</sup>, Tommaso Fontana<sup>1</sup>, Roberto

Mandrioli<sup>3</sup>, Přemysl Mladěnka<sup>2</sup> and Laura Mercolini<sup>1</sup>

<sup>1</sup> Department of Pharmacy and Biotechnology (FaBiT), Alma Mater Studiorum - University of Bologna, Via Belmeloro 6, 40126 Bologna (Italy).

<sup>2</sup> Department of Pharmacology and Toxicology, Faculty of Pharmacy in Hradec Králové, Charles University, Heyrovského 1203, 500 05 Hradec Králové (Czech Republic).

<sup>3</sup> Department for Life Quality Studies (QuVi), Alma Mater Studiorum - University of Bologna, Corso d'Augusto 237, 47921 Rimini (Italy).

\* Correspondence: [michele.protti2@unibo.it](mailto:michele.protti2@unibo.it); Tel.: +39-051-209-9740

**Table S1.** System suitability data and specification limits.

| Parameter                | Analyte             | Mean <sup>a,b</sup> | RSD% <sup>a</sup> | Specification      |
|--------------------------|---------------------|---------------------|-------------------|--------------------|
| Retention ( $t_R$ ), min | Catechol            | 3.92                | 0.3               | RSD% < 2           |
|                          | 2,5-DHBA            | 5.38                | 0.3               |                    |
|                          | 2,3-DHBA            | 7.12                | 0.4               |                    |
| Capacity (k)             | Catechol            | 2.02                | 0.3               | 1.5 < k < 5        |
|                          | 2,5-DHBA            | 3.29                | 0.3               |                    |
|                          | 2,3-DHBA            | 4.54                | 0.4               |                    |
| Selectivity ( $\alpha$ ) | Catechol / 2,5-DHBA | 1.63                | 0.4               | $\alpha > 1.1$     |
|                          | 2,5-DHBA / 2,3-DHBA | 1.38                | 0.4               |                    |
| Resolution (R)           | Catechol / 2,5-DHBA | 5.54                | 0.4               | R > 2              |
|                          | 2,5-DHBA / 2,3-DHBA | 4.61                | 0.4               |                    |
| Efficiency (N)           | Catechol            | 3400                | 0.7               | N > 2500           |
|                          | 2,5-DHBA            | 4700                | 0.8               |                    |
|                          | 2,3-DHBA            | 5800                | 0.8               |                    |
| HETP (H), $\mu\text{m}$  | Catechol            | 30                  | 0.7               | H < 40             |
|                          | 2,5-DHBA            | 21                  | 0.8               |                    |
|                          | 2,3-DHBA            | 17                  | 0.8               |                    |
| Peak asymmetry ( $A_s$ ) | Catechol            | 1.08                | 1.0               | 0.8 < $A_s$ < 1.25 |
|                          | 2,5-DHBA            | 1.02                | 0.9               |                    |
|                          | 2,3-DHBA            | 0.91                | 1.1               |                    |

<sup>a</sup>  $n = 6$ .

**Table S2.** Results of robustness tests.

| Parameter                | Range            | Performance index <sup>a</sup> | Effect (variation range) <sup>b</sup> |
|--------------------------|------------------|--------------------------------|---------------------------------------|
| Buffer pH                | 1.8 - 2.2        | k                              | -9% to +15%                           |
|                          |                  | R                              | -8% to +12%                           |
|                          |                  | N                              | -2% to +5%                            |
|                          |                  | T <sub>f</sub>                 | -0.1% to +0.2%                        |
| Mobile phase composition | 85 - 90% buffer  | k                              | -15% to +20%                          |
|                          |                  | R                              | -10% to -17%                          |
|                          |                  | N                              | -5% to +1%                            |
|                          |                  | T <sub>f</sub>                 | +5% to +16%                           |
| Flow rate                | 0.9 - 1.1 mL/min | k                              | -10% to +13%                          |
|                          |                  | R                              | -0.5% to +1%                          |
|                          |                  | N                              | -0.5% to +0.7%                        |
|                          |                  | T <sub>f</sub>                 | +5% to +9%                            |
| Injection volume         | 45 - 55 $\mu$ L  | k                              | -0.0% to +0.1%                        |
|                          |                  | R                              | -6% to +3%                            |
|                          |                  | N                              | -0.1% to +0.1%                        |
|                          |                  | T <sub>f</sub>                 | -0.0% to +10%                         |
| Temperature              | 18 -28°C         | k                              | -17% to +13%                          |
|                          |                  | R                              | -5% to +4%                            |
|                          |                  | N                              | -12% to +7%                           |
|                          |                  | T <sub>f</sub>                 | -0.0% to +0.1%                        |
| Column production lot    | 3 different lots | k                              | -0.4% to +0.5%                        |
|                          |                  | R                              | -0.0% to +3%                          |
|                          |                  | N                              | -3% to +5%                            |
|                          |                  | T <sub>f</sub>                 | -0.2% to +0.1%                        |

<sup>a</sup> k = capacity factor; R = resolution; N = theoretical plate number; T<sub>f</sub> = tailing factor.

<sup>b</sup> n = 6.

**Table S3.** Ruggedness assay results.

| Variable  |              |            | Concentration | Mean bias (%) <sup>a</sup> | RSD% <sup>a</sup> |
|-----------|--------------|------------|---------------|----------------------------|-------------------|
| Analyst 1 | Instrument 1 | Location 1 | Low           | -                          | -                 |
|           |              |            | Middle        | -                          | -                 |
|           |              |            | High          | -                          | -                 |
|           | Instrument 2 | Location 2 | Low           | -4.0                       | 5.2               |
|           |              |            | Middle        | -3.1                       | 3.9               |
|           |              |            | High          | +1.7                       | 2.8               |
| Analyst 2 | Instrument 1 | Location 1 | Low           | -5.7                       | 8.4               |
|           |              |            | Middle        | -2.2                       | 6.4               |
|           |              |            | High          | -1.6                       | 4.0               |
| Analyst 3 | Instrument 1 | Location 1 | Low           | +6.9                       | 7.0               |
|           |              |            | Middle        | +3.4                       | 5.2               |
|           |              |            | High          | +2.0                       | 3.1               |
|           | Instrument 2 | Location 2 | Low           | -5.6                       | 6.2               |
|           |              |            | Middle        | -4.1                       | 5.6               |
| Analyst 4 | Instrument 2 | Location 2 | High          | -2.9                       | 4.2               |
|           |              |            | Low           | -6.7                       | 6.8               |
|           |              |            | Middle        | +3.9                       | 6.3               |
|           |              |            | High          | +2.8                       | 4.3               |

<sup>a</sup> The results are relative to the baseline of Analyst 1 working on Instrument 1 at Location 1.

**Table S4.** Results of stability assays.

| Type         | Temperature | Time                     | Concentration | % Recovery |
|--------------|-------------|--------------------------|---------------|------------|
| Benchtop     | RT          | 4 h                      | Low           | 96.5       |
|              |             |                          | High          | 97.0       |
|              |             | 12 h                     | Low           | 91.4       |
|              |             |                          | High          | 93.7       |
|              |             | 24 h                     | Low           | 86.8       |
|              |             |                          | High          | 87.1       |
| Refrigerated | 4°C         | 1 d                      | Low           | 97.1       |
|              |             |                          | High          | 97.8       |
|              |             | 3 d                      | Low           | 94.0       |
|              |             |                          | High          | 95.1       |
|              |             | 7 d                      | Low           | 91.3       |
|              |             |                          | High          | 91.7       |
| Frozen       | -20°C       | 7 d                      | Low           | 99.3       |
|              |             |                          | High          | 99.5       |
|              |             | 15 d                     | Low           | 98.4       |
|              |             |                          | High          | 99.0       |
|              |             | 30 d                     | Low           | 97.6       |
|              |             |                          | High          | 98.2       |
| Freeze-thaw  | -20°C       | 3 cycles:<br>7, 14, 21 d | Low           | 95.3       |
|              |             |                          | High          | 96.8       |
